# Supplementary material
Source: PubMed Central journal article supplement (PMC2741713)
Supplement: jc.2009-0212_1.pdf [file jc.2009-0212_1.pdf]

# Supplementary Figure 1. Log2 fold change for obese vs lean comparison for genes in different functional categories of the thyroid-responsive gene set

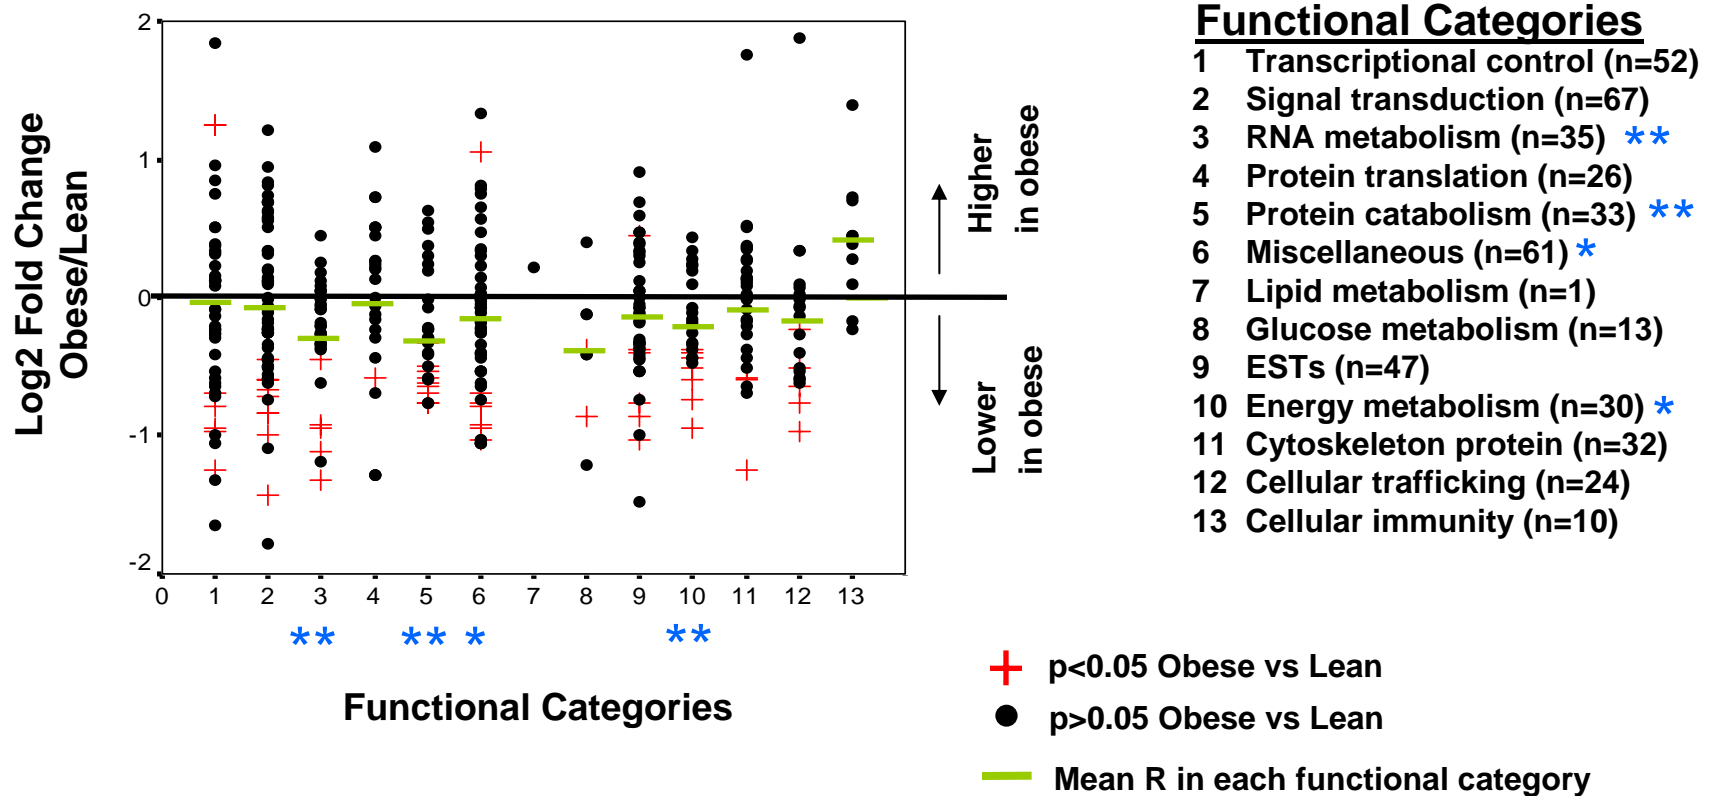

\*\* p<0.01, \*\*\* p<0.001 for mean of Pearson correlation deviating from 0 in each functional category
