# Supplementary material
Source: PubMed Central journal article supplement (PMC2741713)
Supplement: jc.2009-0212_2.pdf [file jc.2009-0212_2.pdf]

## Supplementary Figure 2. Pearson correlation of genes in the thyroid-responsive gene set with *PPARGC1A* and *LEPR* expression

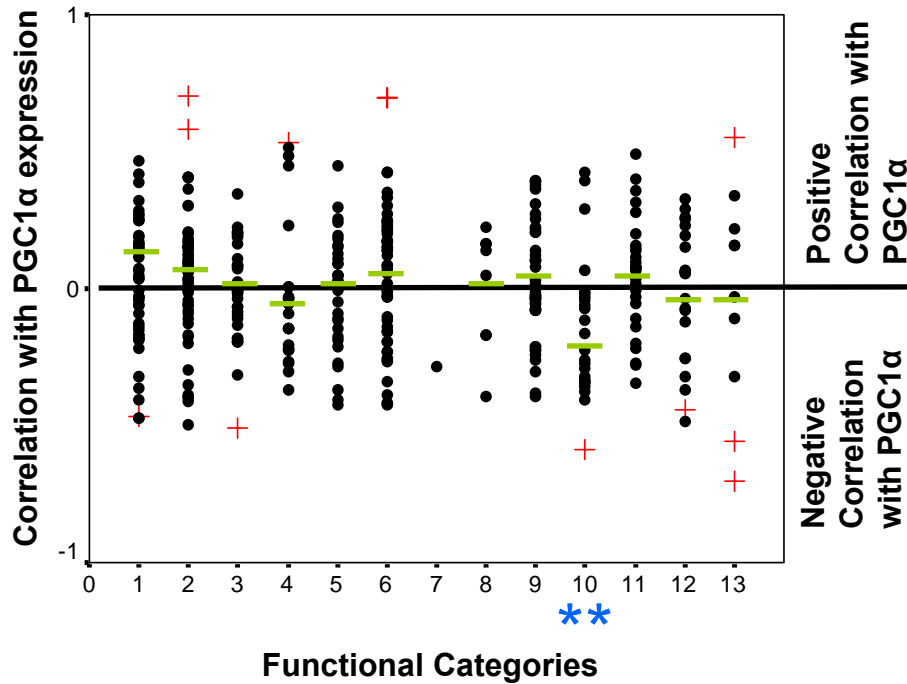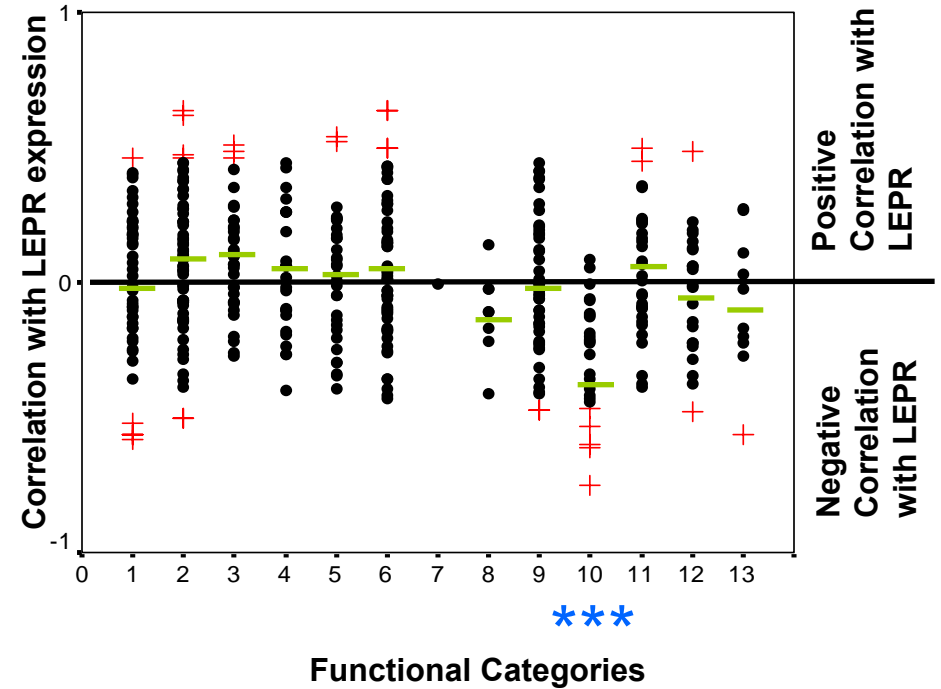

- |                                  |                                |
|----------------------------------|--------------------------------|
| 1 Transcriptional control (n=52) | 8 Glucose metabolism (n=13)    |
| 2 Signal transduction (n=67)     | 9 ESTs (n=47)                  |
| 3 RNA metabolism (n=35)          | 10 Energy metabolism (n=30)    |
| 4 Protein translation (n=26)     | 11 Cytoskeleton protein (n=32) |
| 5 Protein catabolism (n=33)      | 12 Cellular trafficking (n=24) |
| 6 Miscellaneous (n=61)           | 13 Cellular immunity (n=10)    |
| 7 Lipid metabolism (n=1)         |                                |

- p>0.05 Obese / Lean
- + p<0.05 Obese / Lean
- Obese / Lean
- Mean R in each functional category

\*\* p<0.01, \*\*\* p<0.001 for mean of Pearson correlation deviating from 0 in each functional category
