# Supplementary material
Source: PubMed Central journal article supplement (PMC2741713)

## Supplementary Figure 3

### Genes regulating lipid synthesis (PCR)

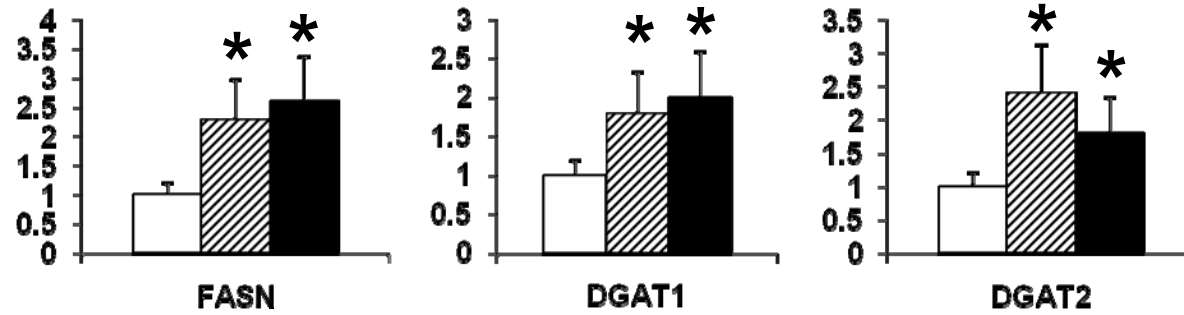

### Genes regulating lipid oxidation (array)

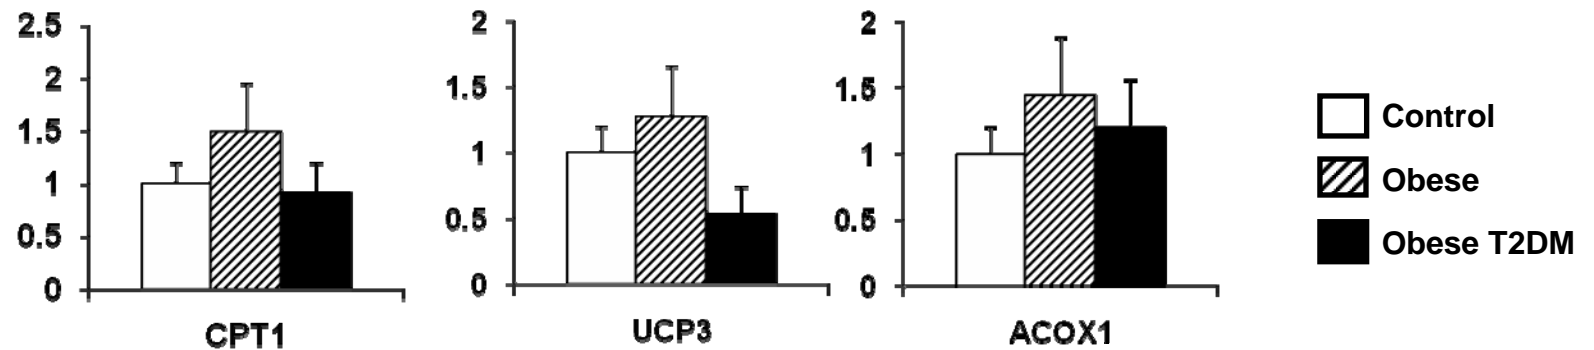

### Other (PCR)

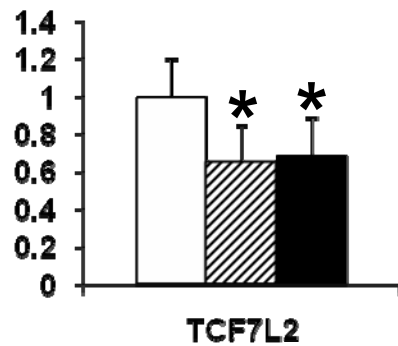

Supplement: jc.2009-0212_3.pdf [file jc.2009-0212_3.pdf]
