# Supplementary material
Source: PubMed Central journal article supplement (PMC2741713)
Supplement: jc.2009-0212_4.pdf [file jc.2009-0212_4.pdf]

T3 Effect Muscle  
Human Liver Ob  
ob/ob mice  
LIRKO  
PGC1 $\alpha$   
PGC1 $\beta$

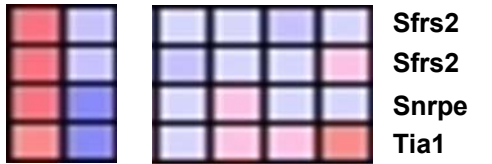

**RNA Metabolism**

ob/ob = Log2 fold change ob/ob liver vs. control liver (<http://www.diabetesgenome.org/chipperdb/expt.cgi?id=65>)

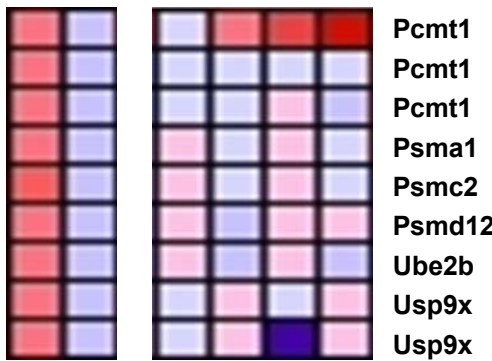

**Protein Degradation**

LIRKO = Log2 fold change liver insulin receptor knockout mice vs. control mice (Biddinger, Cell Metabolism 2008)

PGC1 $\alpha/\beta$  = Log2 fold change in PGC1  $\alpha$  or  $\beta$  overexpressing mouse primary hepatocytes vs. GFP (<http://www.diabetesgenome.org/chipperdb/expt.cgi?id=73>)

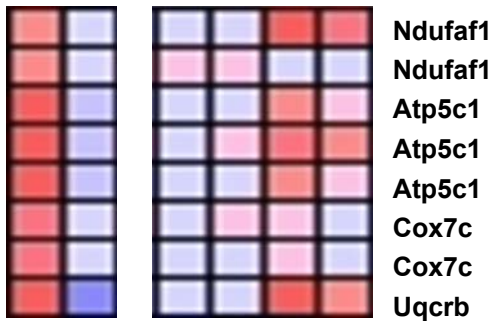

**Energy Metabolism**

Data obtained from Affymetrix U74av2 mouse microarrays. Heatmap is globally normalized.

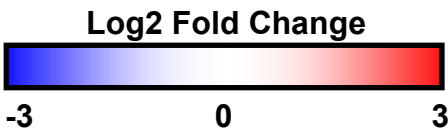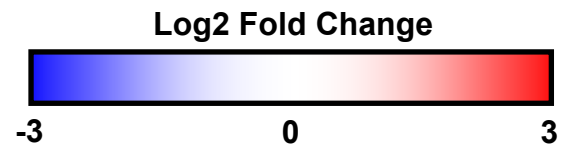

**Supplementary Figure 4.** Heatmap showing Log2 fold changes for genes upregulated by T3 in human skeletal muscle (labelled "T3 Effect Muscle" ) and downregulated in liver of obese subjects ("Human Liver Ob") in different models.
