# Supplementary material
Source: PubMed Central journal article supplement (PMC2741713)
Supplement: jc.2009-0212_5.pdf [file jc.2009-0212_5.pdf]

**Supplementary Table 1.** Characteristics of study subjects used in the PCR verification. Mean  $\pm$  SD; \* p<0.05 , † p<0.005 vs. lean controls. NA=not assessed. To convert to mg/dL divide: glucose by 0.0555, cholesterol by 0.0259 and triglycerides by 0.0113. To convert insulin to mU/L divide by 6.945.

|                                      | <b>Lean Controls</b> | <b>Obese</b>       | <b>Obese T2DM</b>  |
|--------------------------------------|----------------------|--------------------|--------------------|
| Subjects in Group                    | 6                    | 7                  | 11                 |
| Gender (M/F)                         | 0/6                  | 1/6                | 1/11               |
| Age (years)                          | 39.1 $\pm$ 9.8       | 36.4 $\pm$ 9.8     | 47.0 $\pm$ 11.9    |
| Body mass index (kg/m <sup>2</sup> ) | 22.6 $\pm$ 3.5       | 49.1 $\pm$ 6.9 †   | 47.2 $\pm$ 7.0 †   |
| Duration of DM (years)               | NA                   | NA                 | 1.5 $\pm$ 2.9      |
| Hemoglobin A1c                       | 5.2 $\pm$ 0.3        | 5.2 $\pm$ 0.2      | 7.1 $\pm$ 1.7 †    |
| Fasting Glucose (mmol/L)             | 4.6 $\pm$ 0.8        | 5.3 $\pm$ 0.4      | 7.7 $\pm$ 0.4 *    |
| Fasting Insulin (pmol/L)             | 62.5 $\pm$ 38.8      | 166.7 $\pm$ 113.2* | 345.9 $\pm$ 235.4* |
| HOMA-IR                              | 2.2 $\pm$ 2.0        | 5.4 $\pm$ 3.1*     | 20.2 $\pm$ 11.3    |
| Si (Insulin Sensitivity)             | NA                   | 1.13 $\pm$ 0.90    | 0.26 $\pm$ 0.22    |
| Sg (Glucose Effectiveness)           | NA                   | 0.014 $\pm$ 0.006  | 0.014 $\pm$ 0.004  |
| Cholesterol (mmol/L)                 | 4.6 $\pm$ 0.7        | 5.7 $\pm$ 0.3 *    | 4.5 $\pm$ 0.9      |
| LDL – cholesterol (mmol/L)           | 3.1 $\pm$ 0.7        | 3.7 $\pm$ 0.7      | 2.5 $\pm$ 0.6      |
| HDL – cholesterol (mmol/L)           | 1.2 $\pm$ 0.3        | 1.0 $\pm$ 0.1      | 1.2 $\pm$ 0.2      |
| Triglycerides (mmol/L)               | 0.7 $\pm$ 0.2        | 2.1 $\pm$ 0.7      | 1.6 $\pm$ 1.0      |
| ALT (U/L)                            | 25 $\pm$ 8           | 29 $\pm$ 8         | 31 $\pm$ 19        |
| AST (U/L)                            | 32 $\pm$ 11          | 24 $\pm$ 4         | 29 $\pm$ 12        |
